# Supplementary material
Source: Springer Nature journal article supplement (https://www.springermedizin.de/resource/supplementary/13075_2013_4133_MOESM4_ESM.pdf/9696116)

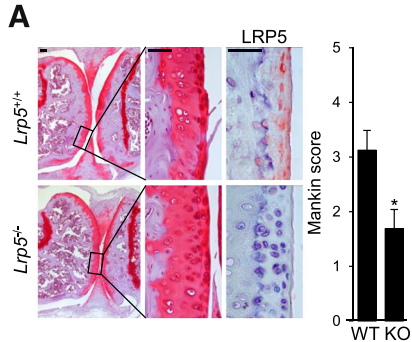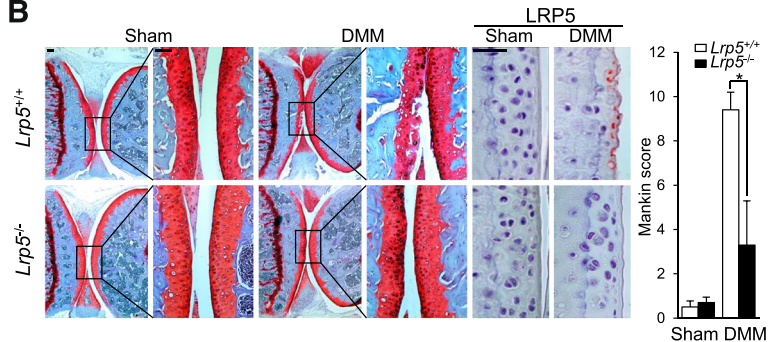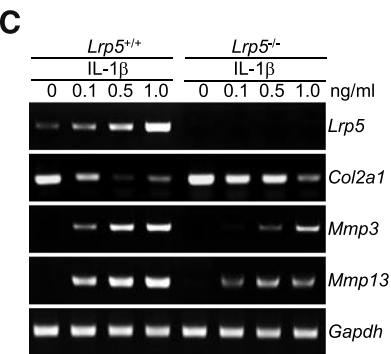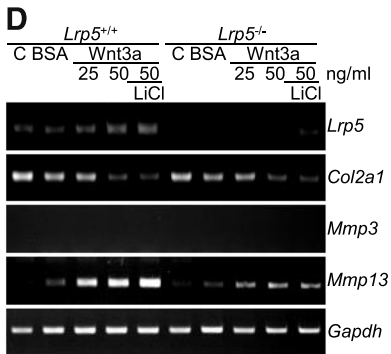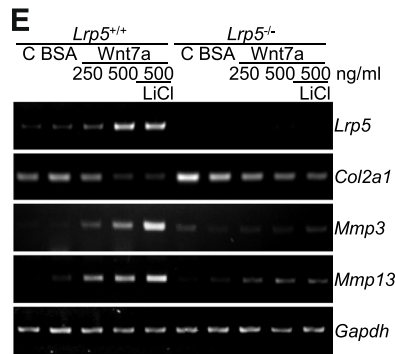

Supplement: MOESM4 [file 9696116]
